# Supplementary material for: 427 吹き抜けを有する住宅の床暖房システム利用に関する研究 : その3.2階空間気流場の解析(環境工学)
Source: Springer Nature journal article supplement (doi:10.1007/s00262-020-02788-1), 2008-03-01
Supplement: MOESM1 [file 18620470]

**SUPPLEMENTARY MATERIALS**

**Fig. 1S - Baseline SAA and RR in CT Cohort**

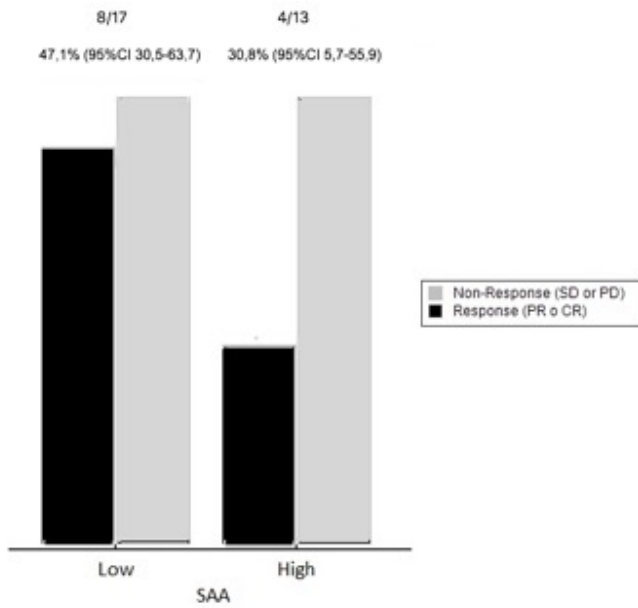

**Fig. 2S - PFS (A) and OS (B) according to baseline SAA in CT Cohort**

**A**

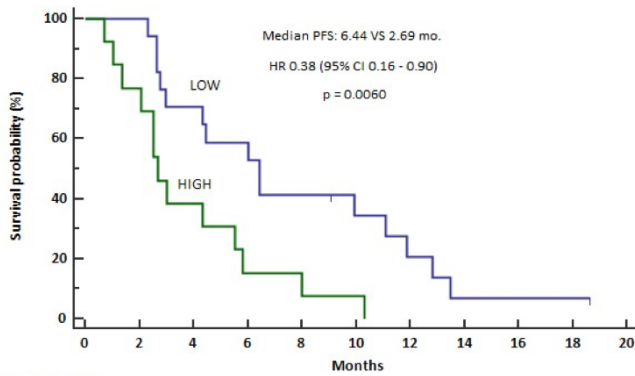

|             | 0  | 2  | 4  | 6  | 8 | 10 | 12 | 14 | 16 | 18 | 20 |
|-------------|----|----|----|----|---|----|----|----|----|----|----|
| <b>Low</b>  | 17 | 17 | 12 | 10 | 7 | 5  | 3  | 1  | 1  | 1  | 0  |
| <b>High</b> | 13 | 10 | 5  | 2  | 2 | 1  | 0  | 0  | 0  | 0  | 0  |

**B**

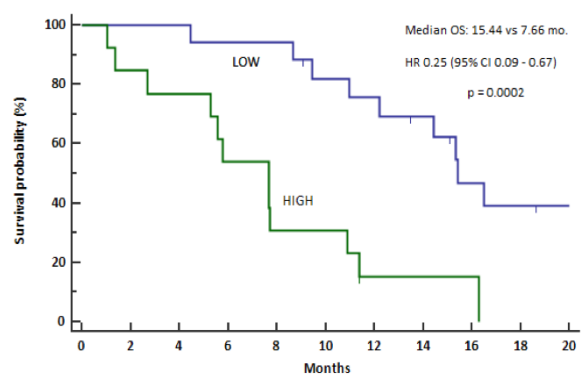

|             | 0  | 2  | 4  | 6  | 8  | 10 | 12 | 14 | 16 | 18 | 20 |
|-------------|----|----|----|----|----|----|----|----|----|----|----|
| <b>Low</b>  | 17 | 17 | 17 | 16 | 16 | 13 | 12 | 10 | 6  | 5  | 4  |
| <b>High</b> | 13 | 11 | 10 | 7  | 4  | 4  | 1  | 1  | 1  | 0  | 0  |

**Table 1S** – Relationship between Response Rate (RR) and clinical characteristics in P Cohort

|                                     | p value | Response |    | Stable Disease or Progression |    |
|-------------------------------------|---------|----------|----|-------------------------------|----|
|                                     |         | no       | %  | n                             | %  |
| <b>Age (in years)</b>               | 0.330   |          |    |                               |    |
| <65                                 |         | 4        | 27 | 11                            | 73 |
| ≥ 65                                |         | 12       | 44 | 15                            | 56 |
| <b>Sex</b>                          | 1.000   |          |    |                               |    |
| Male                                |         | 11       | 37 | 19                            | 73 |
| Female                              |         | 5        | 41 | 7                             | 59 |
| <b>ECOG PS</b>                      | 0.790   |          |    |                               |    |
| 0                                   |         | 7        | 44 | 9                             | 56 |
| 1-2                                 |         | 9        | 35 | 17                            | 65 |
| <b>Smoking history</b>              | 1.000   |          |    |                               |    |
| Never Smokers                       |         | 2        | 40 | 3                             | 60 |
| Current or Ex Smokers               |         | 14       | 38 | 23                            | 62 |
| <b>Hystology</b>                    | 0.380   |          |    |                               |    |
| Squamous                            |         | 1        | 17 | 5                             | 83 |
| Non Squamous                        |         | 15       | 42 | 21                            | 58 |
| <b>BMI Categories (kg/m2)</b>       | 0.532   |          |    |                               |    |
| <18.5                               |         | 1        | 50 | 1                             | 50 |
| 18.5-24.9                           |         | 12       | 43 | 16                            | 57 |
| ≥25                                 |         | 3        | 25 | 9                             | 75 |
| <b>Comorbidities (No vs Yes)</b>    | 0.575   |          |    |                               |    |
| No                                  |         | 9        | 45 | 11                            | 55 |
| Yes                                 |         | 7        | 32 | 15                            | 68 |
| <b>No. of Metastatic Sites</b>      | 0.209   |          |    |                               |    |
| 1-2                                 |         | 9        | 50 | 9                             | 50 |
| ≥ 3                                 |         | 7        | 29 | 17                            | 71 |
| <b>Brain Metastases (No vs Yes)</b> | 0.602   |          |    |                               |    |
| No                                  |         | 9        | 33 | 18                            | 67 |
| Yes                                 |         | 7        | 47 | 8                             | 63 |
| <b>Liver Metastases (No vs Yes)</b> | 1.000   |          |    |                               |    |
| No                                  |         | 15       | 38 | 24                            | 62 |
| Yes                                 |         | 1        | 33 | 2                             | 67 |
| <b>Pleural effusion (No vs Yes)</b> | 0.303   |          |    |                               |    |
| No                                  |         | 13       | 45 | 16                            | 55 |
| Yes                                 |         | 3        | 23 | 10                            | 77 |
| <b>Prior thoracic Radioterapy</b>   | 1.000   |          |    |                               |    |
| No                                  |         | 9        | 38 | 15                            | 62 |
| Yes                                 |         | 7        | 39 | 11                            | 61 |
| <b>IrAE (No vs Yes)</b>             | 0.207   |          |    |                               |    |
| <b>No</b>                           |         | 11       | 48 | 12                            | 52 |
| <b>Yes</b>                          |         | 5        | 26 | 14                            | 74 |
| <b>Steroid Use</b>                  | 1.000   |          |    |                               |    |
| No                                  |         | 11       | 39 | 17                            | 61 |
| Yes                                 |         | 5        | 36 | 9                             | 64 |

*BMI, Body Mass Index; IrAE, Immune-related Adverse Events; no, number*

Table 2S - Baseline characteristics of the patients in CT Cohort

|                                   | No. Patients (30) | % 100 |
|-----------------------------------|-------------------|-------|
| <b>Age (years)</b>                |                   |       |
| Median (range)                    | 62.5 (43-83)      | -     |
| ≥ 65                              | 13                | 43    |
| <65                               | 17                | 57    |
| <b>Sex</b>                        |                   |       |
| Male                              | 18                | 60    |
| Female                            | 12                | 40    |
| <b>ECOG Performance Status</b>    |                   |       |
| 0                                 | 11                | 37    |
| 1                                 | 14                | 47    |
| 2                                 | 5                 | 16    |
| <b>Smoking history</b>            |                   |       |
| Current or Former Smokers         | 18                | 60    |
| Never Smokers                     | 12                | 40    |
| <b>Hystology</b>                  |                   |       |
| Squamous                          | 7                 | 23    |
| Non-Squamous                      | 23                | 77    |
| <b>No. of Metastatic Sites</b>    |                   |       |
| 1                                 | 5                 | 17    |
| 2                                 | 9                 | 30    |
| 3                                 | 7                 | 23    |
| ≥ 4                               | 9                 | 30    |
| <b>Brain Metastases</b>           |                   |       |
| No                                | 22                | 73    |
| Yes                               | 8                 | 27    |
| <b>Site of Mestastases</b>        |                   |       |
| Pleural Effusion                  | 9                 | 30    |
| Liver                             | 3                 | 10    |
| Lung                              | 13                | 43    |
| Bone                              | 15                | 50    |
| Mediastinal Nodes                 | 19                | 63    |
| Adrenal Glands                    | 4                 | 13    |
| Other                             | 4                 | 13    |
| <b>BMI Categories</b>             |                   |       |
| Underweight <18.5                 | 2                 | 7     |
| Normal weight 18.5-24.9           | 21                | 70    |
| Overweight or Obesity ≥25         | 7                 | 23    |
| <b>Comorbidities</b>              |                   |       |
| No                                | 3                 | 10    |
| Yes                               | 27                | 90    |
| <b>Prior thoracic Radioterapy</b> |                   |       |
| No                                | 29                | 97    |
| Yes                               | 1                 | 3     |
| <b>Steroid Use</b>                |                   |       |
| No                                | 4                 | 13    |
| Yes                               | 26                | 87    |
| No. number;                       |                   |       |
